# Supplementary material
Source: PubMed Central journal article supplement (PMC6821541)
Supplement: nqz180_supplemental_tables_and_figure.pdf [file nqz180_supplemental_tables_and_figure.pdf]

**Manuscript:** Changes in dairy product consumption and risk of type 2 diabetes: results from three large prospective cohorts of U.S. men and women.

**Authors:** Jean-Philippe Drouin-Chartier, PhD; Yanping Li, PhD; Andres Victor Ardisson Korat, ScD; Ming Ding, ScD; Benoît Lamarche, PhD; JoAnn E. Manson, MD DrPH; Eric B. Rimm, ScD; Walter C. Willett, MD DrPH; Frank B. Hu, MD PhD

**Supplementary Table 1: Age-adjusted initial intake and changes in dairy products according to baseline 4-year changes in total dairy product consumption.<sup>1</sup>**

|                                              | Changes in total dairy product consumption |                         |                                |                         |                 |
|----------------------------------------------|--------------------------------------------|-------------------------|--------------------------------|-------------------------|-----------------|
|                                              | Decrease                                   |                         | No change or relatively stable | Increase                |                 |
|                                              | >1.00 serving/d                            | >0.14 to 1.00 serving/d | ±0.14 serving/d                | >0.14 to 1.00 serving/d | >1.00 serving/d |
| <b>HPFS (n=34,224)</b>                       |                                            |                         |                                |                         |                 |
| Participants, n                              | 5,399                                      | 9,834                   | 5,624                          | 8,792                   | 4,575           |
| Initial total dairy intake, serving/d        | 3.70 (1.69)                                | 1.89 (1.07)             | 1.38 (1.10)                    | 1.41 (1.04)             | 1.70 (1.13)     |
| Change in total dairy intake, serving/d      | -2.01 (0.97)                               | -0.49 (0.24)            | 0.00 (0.08)                    | 0.49 (0.24)             | 1.96 (0.93)     |
| Initial low-fat dairy intake, serving/d      | 1.88 (1.55)                                | 1.00 (0.91)             | 0.76 (0.89)                    | 0.74 (0.82)             | 0.87 (0.85)     |
| Change in low-fat dairy intake, serving/d    | -0.87 (1.10)                               | -0.13 (0.47)            | 0.09 (0.37)                    | 0.38 (0.50)             | 1.23 (1.07)     |
| Initial high-fat dairy intake, serving/d     | 1.82 (1.63)                                | 0.89 (0.72)             | 0.63 (0.68)                    | 0.67 (0.67)             | 0.83 (0.82)     |
| Change in high-fat dairy intake, serving/d   | -1.09 (1.13)                               | -0.35 (0.47)            | -0.09 (0.37)                   | 0.10 (0.48)             | 0.68 (1.08)     |
| Initial reduced-fat milk intake, serving/d   | 1.45 (1.44)                                | 0.72 (0.82)             | 0.57 (0.82)                    | 0.54 (0.75)             | 0.64 (0.77)     |
| Change in reduced-fat milk intake, serving/d | -0.71 (1.03)                               | -0.08 (0.44)            | 0.06 (0.35)                    | 0.24 (0.48)             | 0.94 (1.00)     |
| Initial whole milk intake, serving/d         | 0.29 (0.80)                                | 0.11 (0.36)             | 0.09 (0.33)                    | 0.10 (0.36)             | 0.14 (0.43)     |
| Change in whole milk intake, serving/d       | -0.17 (0.51)                               | -0.06 (0.25)            | -0.03 (0.22)                   | -0.03 (0.25)            | 0.00 (0.33)     |
| Initial cheese intake, serving/d             | 0.89 (0.88)                                | 0.58 (0.43)             | 0.40 (0.37)                    | 0.42 (0.38)             | 0.49 (0.43)     |
| Change in cheese intake, serving/d           | -0.44 (0.62)                               | -0.21 (0.33)            | -0.04 (0.25)                   | 0.10 (0.34)             | 0.29 (0.61)     |
| Initial low-fat cheese intake, serving/d     | 0.19 (0.37)                                | 0.13 (0.20)             | 0.08 (0.15)                    | 0.09 (0.16)             | 0.11 (0.19)     |
| Change in low-fat cheese intake, serving/d   | -0.08 (0.23)                               | -0.05 (0.17)            | -0.01 (0.13)                   | 0.02 (0.17)             | 0.05 (0.23)     |
| Initial high-fat cheese intake, serving/d    | 0.71 (0.80)                                | 0.45 (0.38)             | 0.32 (0.33)                    | 0.33 (0.34)             | 0.38 (0.37)     |
| Change in high-fat cheese intake, serving/d  | -0.35 (0.57)                               | -0.16 (0.31)            | -0.03 (0.24)                   | 0.08 (0.31)             | 0.23 (0.56)     |
| Initial cottage cheese intake, serving/d     | 0.18 (0.35)                                | 0.12 (0.18)             | 0.07 (0.13)                    | 0.08 (0.14)             | 0.10 (0.17)     |
| Change in cottage cheese intake, serving/d   | -0.07 (0.20)                               | -0.04 (0.15)            | -0.01 (0.11)                   | 0.02 (0.15)             | 0.04 (0.20)     |
| Initial cream cheese intake, serving/d       | 0.08 (0.19)                                | 0.05 (0.12)             | 0.04 (0.09)                    | 0.04 (0.09)             | 0.04 (0.10)     |
| Change in cream cheese intake, serving/d     | -0.03 (0.13)                               | -0.02 (0.10)            | 0.00 (0.08)                    | 0.01 (0.10)             | 0.03 (0.13)     |
| Initial other cheese intake, serving/d       | 0.64 (0.77)                                | 0.41 (0.35)             | 0.29 (0.31)                    | 0.30 (0.31)             | 0.34 (0.35)     |
| Change in other cheese intake, serving/d     | -0.32 (0.56)                               | -0.15 (0.29)            | -0.03 (0.22)                   | 0.07 (0.29)             | 0.21 (0.54)     |
| Initial yogurt intake, serving/d             | 0.14 (0.37)                                | 0.09 (0.19)             | 0.05 (0.15)                    | 0.06 (0.15)             | 0.07 (0.16)     |
| Change in yogurt intake, serving/d           | -0.06 (0.23)                               | -0.02 (0.16)            | 0.00 (0.13)                    | 0.03 (0.17)             | 0.07 (0.24)     |
| Initial cream intake, serving/d              | 0.48 (1.09)                                | 0.09 (0.34)             | 0.06 (0.30)                    | 0.06 (0.29)             | 0.10 (0.39)     |
| Change in cream intake, serving/d            | -0.33 (0.76)                               | -0.04 (0.22)            | 0.00 (0.16)                    | 0.04 (0.22)             | 0.28 (0.73)     |
| Initial ice cream intake, serving/d          | 0.26 (0.45)                                | 0.18 (0.23)             | 0.13 (0.19)                    | 0.14 (0.18)             | 0.16 (0.22)     |
| Change in ice cream intake, serving/d        | -0.11 (0.26)                               | -0.07 (0.19)            | -0.02 (0.15)                   | 0.01 (0.19)             | 0.05 (0.27)     |
| Initial sherbet intake, serving/d            | 0.10 (0.31)                                | 0.07 (0.16)             | 0.04 (0.11)                    | 0.05 (0.12)             | 0.05 (0.14)     |
| Change in sherbet intake, serving/d          | 0.01 (0.22)                                | 0.02 (0.17)             | 0.04 (0.15)                    | 0.08 (0.20)             | 0.12 (0.28)     |
| <b>NHS (n=76,531)</b>                        |                                            |                         |                                |                         |                 |
| Participants, n                              | 13,641                                     | 21,225                  | 10,366                         | 19,562                  | 11,737          |
| Initial total dairy intake, serving/d        | 3.72 (1.54)                                | 2.09 (1.07)             | 1.60 (1.11)                    | 1.56 (1.03)             | 1.69 (1.04)     |
| Change in total dairy intake, serving/d      | -2.01 (0.95)                               | -0.50 (0.24)            | 0.00 (0.08)                    | 0.50 (0.24)             | 1.94 (0.90)     |

|                                              |              |              |              |              |              |
|----------------------------------------------|--------------|--------------|--------------|--------------|--------------|
| Initial low-fat dairy intake, serving/d      | 1.95 (1.43)  | 1.15 (0.95)  | 0.91 (0.93)  | 0.87 (0.85)  | 0.93 (0.82)  |
| Change in low-fat dairy intake, serving/d    | -0.87 (1.09) | -0.11 (0.52) | 0.14 (0.43)  | 0.48 (0.55)  | 1.42 (1.06)  |
| Initial high-fat dairy intake, serving/d     | 1.77 (1.58)  | 0.93 (0.74)  | 0.69 (0.68)  | 0.69 (0.65)  | 0.76 (0.74)  |
| Change in high-fat dairy intake, serving/d   | -1.09 (1.14) | -0.39 (0.52) | -0.14 (0.43) | 0.02 (0.53)  | 0.47 (1.02)  |
| Initial reduced-fat milk intake, serving/d   | 1.36 (1.26)  | 0.77 (0.82)  | 0.64 (0.82)  | 0.59 (0.75)  | 0.62 (0.69)  |
| Change in reduced-fat milk intake, serving/d | -0.63 (0.94) | -0.06 (0.48) | 0.07 (0.38)  | 0.28 (0.53)  | 0.96 (0.93)  |
| Initial whole milk intake, serving/d         | 0.21 (0.61)  | 0.11 (0.35)  | 0.08 (0.30)  | 0.08 (0.29)  | 0.10 (0.30)  |
| Change in whole milk intake, serving/d       | -0.12 (0.37) | -0.06 (0.24) | -0.04 (0.20) | -0.03 (0.22) | -0.01 (0.27) |
| Initial cheese intake, serving/d             | 0.91 (0.83)  | 0.63 (0.44)  | 0.47 (0.41)  | 0.47 (0.39)  | 0.50 (0.42)  |
| Change in cheese intake, serving/d           | -0.46 (0.62) | -0.23 (0.36) | -0.06 (0.29) | 0.07 (0.37)  | 0.24 (0.60)  |
| Initial low-fat cheese intake, serving/d     | 0.23 (0.38)  | 0.16 (0.22)  | 0.12 (0.19)  | 0.12 (0.18)  | 0.13 (0.20)  |
| Change in low-fat cheese intake, serving/d   | -0.10 (0.28) | -0.05 (0.21) | -0.01 (0.18) | 0.03 (0.22)  | 0.07 (0.29)  |
| Initial high-fat cheese intake, serving/d    | 0.68 (0.74)  | 0.47 (0.38)  | 0.35 (0.35)  | 0.35 (0.33)  | 0.37 (0.36)  |
| Change in high-fat cheese intake, serving/d  | -0.35 (0.57) | -0.18 (0.33) | -0.05 (0.27) | 0.04 (0.34)  | 0.16 (0.54)  |
| Initial cottage cheese intake, serving/d     | 0.21 (0.35)  | 0.15 (0.21)  | 0.10 (0.17)  | 0.11 (0.17)  | 0.12 (0.18)  |
| Change in cottage cheese intake, serving/d   | -0.10 (0.24) | -0.05 (0.18) | -0.01 (0.15) | 0.01 (0.18)  | 0.04 (0.22)  |
| Initial cream cheese intake, serving/d       | 0.10 (0.23)  | 0.07 (0.13)  | 0.05 (0.10)  | 0.05 (0.10)  | 0.05 (0.12)  |
| Change in cream cheese intake, serving/d     | -0.03 (0.20) | -0.01 (0.14) | 0.01 (0.13)  | 0.03 (0.16)  | 0.05 (0.21)  |
| Initial other cheese intake, serving/d       | 0.61 (0.70)  | 0.42 (0.35)  | 0.31 (0.33)  | 0.31 (0.31)  | 0.33 (0.34)  |
| Change in other cheese intake, serving/d     | -0.32 (0.54) | -0.16 (0.31) | -0.05 (0.25) | 0.03 (0.32)  | 0.14 (0.53)  |
| Initial yogurt intake, serving/d             | 0.23 (0.45)  | 0.14 (0.25)  | 0.09 (0.20)  | 0.10 (0.19)  | 0.11 (0.22)  |
| Change in yogurt intake, serving/d           | -0.10 (0.39) | -0.03 (0.24) | 0.01 (0.19)  | 0.07 (0.26)  | 0.17 (0.47)  |
| Initial cream intake, serving/d              | 0.55 (1.18)  | 0.11 (0.39)  | 0.08 (0.35)  | 0.07 (0.32)  | 0.11 (0.43)  |
| Change in cream intake, serving/d            | -0.37 (0.82) | -0.04 (0.25) | 0.00 (0.19)  | 0.03 (0.24)  | 0.26 (0.71)  |
| Initial ice cream intake, serving/d          | 0.24 (0.40)  | 0.18 (0.24)  | 0.13 (0.20)  | 0.14 (0.20)  | 0.14 (0.21)  |
| Change in ice cream intake, serving/d        | -0.12 (0.26) | -0.08 (0.21) | -0.03 (0.17) | -0.01 (0.20) | 0.01 (0.24)  |
| Initial sherbet intake, serving/d            | 0.13 (0.35)  | 0.08 (0.19)  | 0.06 (0.14)  | 0.06 (0.14)  | 0.07 (0.16)  |
| Change in sherbet intake, serving/d          | 0.01 (0.26)  | 0.03 (0.21)  | 0.06 (0.19)  | 0.10 (0.24)  | 0.15 (0.30)  |

**NHS II (n=81,597)**

|                                              |              |              |              |             |             |
|----------------------------------------------|--------------|--------------|--------------|-------------|-------------|
| Participants, n                              | 25,820       | 23,573       | 9,051        | 14,269      | 8,884       |
| Initial total dairy intake, serving/d        | 3.51 (1.48)  | 1.89 (1.02)  | 1.46 (1.09)  | 1.55 (1.09) | 1.71 (1.09) |
| Change in total dairy intake, serving/d      | -2.18 (1.02) | -0.54 (0.25) | -0.01 (0.08) | 0.48 (0.24) | 2.03 (1.01) |
| Initial low-fat dairy intake, serving/d      | 2.16 (1.31)  | 1.10 (0.88)  | 0.87 (0.91)  | 0.92 (0.90) | 1.01 (0.89) |
| Change in low-fat dairy intake, serving/d    | -1.43 (1.10) | -0.30 (0.52) | 0.06 (0.43)  | 0.38 (0.60) | 1.30 (1.25) |
| Initial high-fat dairy intake, serving/d     | 1.35 (1.26)  | 0.78 (0.62)  | 0.60 (0.58)  | 0.63 (0.62) | 0.71 (0.70) |
| Change in high-fat dairy intake, serving/d   | -0.74 (0.99) | -0.25 (0.49) | -0.07 (0.43) | 0.11 (0.58) | 0.71 (1.25) |
| Initial reduced-fat milk intake, serving/d   | 1.68 (1.22)  | 0.76 (0.76)  | 0.62 (0.81)  | 0.63 (0.79) | 0.67 (0.76) |
| Change in reduced-fat milk intake, serving/d | -1.33 (1.05) | -0.35 (0.49) | -0.09 (0.38) | 0.07 (0.52) | 0.79 (1.12) |
| Initial whole milk intake, serving/d         | 0.11 (0.44)  | 0.05 (0.21)  | 0.04 (0.20)  | 0.04 (0.19) | 0.04 (0.21) |
| Change in whole milk intake, serving/d       | -0.06 (0.23) | -0.03 (0.15) | -0.01 (0.12) | 0.00 (0.14) | 0.01 (0.18) |
| Initial cheese intake, serving/d             | 0.76 (0.67)  | 0.54 (0.40)  | 0.42 (0.36)  | 0.43 (0.36) | 0.47 (0.40) |
| Change in cheese intake, serving/d           | -0.29 (0.55) | -0.10 (0.35) | 0.02 (0.29)  | 0.15 (0.39) | 0.29 (0.63) |
| Initial low-fat cheese intake, serving/d     | 0.12 (0.25)  | 0.08 (0.16)  | 0.06 (0.13)  | 0.07 (0.15) | 0.09 (0.17) |
| Change in low-fat cheese intake, serving/d   | 0.03 (0.27)  | 0.06 (0.23)  | 0.08 (0.23)  | 0.14 (0.30) | 0.19 (0.42) |

|                                             |              |              |              |             |             |
|---------------------------------------------|--------------|--------------|--------------|-------------|-------------|
| Initial high-fat cheese intake, serving/d   | 0.64 (0.61)  | 0.46 (0.36)  | 0.35 (0.33)  | 0.36 (0.33) | 0.38 (0.37) |
| Change in high-fat cheese intake, serving/d | -0.32 (0.54) | -0.16 (0.36) | -0.07 (0.32) | 0.01 (0.41) | 0.09 (0.61) |
| Initial cottage cheese intake, serving/d    | 0.11 (0.21)  | 0.07 (0.13)  | 0.05 (0.10)  | 0.06 (0.11) | 0.07 (0.12) |
| Change in cottage cheese intake, serving/d  | -0.04 (0.16) | -0.02 (0.12) | 0.00 (0.10)  | 0.02 (0.13) | 0.03 (0.17) |
| Initial cream cheese intake, serving/d      | 0.09 (0.17)  | 0.06 (0.11)  | 0.05 (0.09)  | 0.05 (0.10) | 0.06 (0.11) |
| Change in cream cheese intake, serving/d    | -0.02 (0.15) | 0.00 (0.12)  | 0.01 (0.12)  | 0.03 (0.14) | 0.04 (0.17) |
| Initial other cheese intake, serving/d      | 0.57 (0.58)  | 0.41 (0.34)  | 0.32 (0.31)  | 0.32 (0.30) | 0.35 (0.34) |
| Change in other cheese intake, serving/d    | -0.23 (0.48) | -0.09 (0.31) | 0.00 (0.25)  | 0.10 (0.34) | 0.20 (0.54) |
| Initial yogurt intake, serving/d            | 0.19 (0.33)  | 0.13 (0.23)  | 0.09 (0.18)  | 0.11 (0.21) | 0.13 (0.22) |
| Change in yogurt intake, serving/d          | -0.04 (0.29) | 0.01 (0.23)  | 0.05 (0.21)  | 0.12 (0.28) | 0.19 (0.39) |
| Initial cream intake, serving/d             | 0.37 (0.95)  | 0.11 (0.39)  | 0.08 (0.35)  | 0.10 (0.39) | 0.15 (0.46) |
| Change in cream intake, serving/d           | -0.18 (0.67) | 0.02 (0.28)  | 0.06 (0.26)  | 0.12 (0.39) | 0.56 (1.00) |
| Initial ice cream intake, serving/d         | 0.15 (0.25)  | 0.11 (0.16)  | 0.08 (0.12)  | 0.09 (0.14) | 0.09 (0.15) |
| Change in ice cream intake, serving/d       | -0.05 (0.18) | -0.02 (0.15) | 0.00 (0.12)  | 0.01 (0.15) | 0.02 (0.18) |
| Initial sherbet intake, serving/d           | 0.17 (0.30)  | 0.13 (0.20)  | 0.10 (0.17)  | 0.11 (0.18) | 0.12 (0.20) |
| Change in sherbet intake, serving/d         | -0.06 (0.23) | -0.02 (0.19) | 0.01 (0.17)  | 0.05 (0.22) | 0.07 (0.27) |

<sup>1</sup> Values are means(SD) or percentages and are standardized to the age distribution of the study population. HPFS: Health Professionals' Follow-up Study; NHS: Nurses' Health Study; NHS II: Nurses' Health Study II.

**Supplementary Table 2: HRs (95% CIs) for type 2 diabetes according to updated 4-year changes in intakes of whole milk, cream, ice cream, and sherbet.<sup>1</sup>**

|                           | Changes in dairy product consumption |                                |                   | P values for trend |
|---------------------------|--------------------------------------|--------------------------------|-------------------|--------------------|
|                           | Decrease                             | No change or relatively stable | Increase          |                    |
| <b>Whole milk</b>         | >0.07 serving/d                      | ±0.07 serving/d                | >0.07 serving/d   |                    |
| <b>HPFS</b>               |                                      |                                |                   |                    |
| Median change             | -0.43                                | 0.00                           | 0.43              |                    |
| Cases/person-years        | 121/28,448                           | 2,097/460,310                  | 82/16,023         |                    |
| Model 1                   | 1.05 (0.87, 1.26)                    | 1.00                           | 1.15 (0.92, 1.43) | 0.68               |
| Model 2                   | 1.09 (0.83, 1.45)                    | 1.00                           | 1.04 (0.83, 1.31) | 0.87               |
| <b>NHS</b>                |                                      |                                |                   |                    |
| Median change             | -0.43                                | 0.00                           | 0.43              |                    |
| Cases/person-years        | 337/66,304                           | 5,469/1,078,202                | 187/34,335        |                    |
| Model 1                   | 1.18 (1.05, 1.32)                    | 1.00                           | 1.12 (0.96, 1.29) | 0.17               |
| Model 2                   | 1.06 (0.89, 1.25)                    | 1.00                           | 1.01 (0.87, 1.18) | 0.72               |
| <b>NHS II</b>             |                                      |                                |                   |                    |
| Median change             | -0.43                                | 0.00                           | 0.43              |                    |
| Cases/person-years        | 132/44,246                           | 3,391/1,028,697                | 90/26,645         |                    |
| Model 1                   | 1.13 (0.95, 1.34)                    | 1.00                           | 1.06 (0.86, 1.31) | 0.51               |
| Model 2                   | 1.10 (0.84, 1.45)                    | 1.00                           | 0.95 (0.77, 1.18) | 0.38               |
| <b>Pooled<sup>2</sup></b> |                                      |                                |                   |                    |
| Model 2                   | 1.07 (0.94, 1.22)                    | 1.00                           | 1.00 (0.90, 1.12) | 0.45               |
| P for heterogeneity       | 0.95                                 | -                              | 0.85              | 0.85               |
| <b>Cream</b>              | >0.07 serving/d                      | ±0.07 serving/d                | >0.07 serving/d   |                    |
| <b>HPFS</b>               |                                      |                                |                   |                    |
| Median change             | -0.43                                | 0.00                           | 0.43              |                    |
| Cases/person-years        | 185/41,153                           | 1,877/416,123                  | 238/47,506        |                    |
| Model 1                   | 1.00 (0.86, 1.17)                    | 1.00                           | 1.09 (0.96, 1.25) | 0.33               |
| Model 2                   | 1.04 (0.87, 1.24)                    | 1.00                           | 1.04 (0.90, 1.19) | 0.90               |
| <b>NHS</b>                |                                      |                                |                   |                    |
| Median change             | -0.43                                | 0.00                           | 0.43              |                    |
| Cases/person-years        | 518/103,631                          | 4,768/953,307                  | 707/121,903       |                    |
| Model 1                   | 1.02 (0.93, 1.12)                    | 1.00                           | 1.12 (1.04, 1.21) | 0.06               |
| Model 2                   | 0.99 (0.89, 1.09)                    | 1.00                           | 1.08 (1.00, 1.17) | 0.08               |
| <b>NHS II</b>             |                                      |                                |                   |                    |
| Median change             | -0.43                                | 0.00                           | 0.57              |                    |
| Cases/person-years        | 471/128,058                          | 2,543/790,263                  | 599/181,267       |                    |
| Model 1                   | 1.07 (0.97, 1.18)                    | 1.00                           | 1.05 (0.96, 1.15) | 0.95               |
| Model 2                   | 1.10 (0.97, 1.25)                    | 1.00                           | 1.02 (0.93, 1.12) | 0.58               |
| <b>Pooled<sup>3</sup></b> |                                      |                                |                   |                    |
| Model 2                   | 1.03 (0.96, 1.11)                    | 1.00                           | 1.05 (0.99, 1.11) | 0.45               |
| P for heterogeneity       | 0.41                                 | -                              | 0.65              | 0.25               |
| <b>Ice cream</b>          | >0.07 serving/d                      | ±0.07 serving/d                | >0.07 serving/d   |                    |
| <b>HPFS</b>               |                                      |                                |                   |                    |
| Median change             | -0.36                                | 0.00                           | 0.36              |                    |
| Cases/person-years        | 311/64,792                           | 1,730/385,547                  | 259/54,441        |                    |
| Model 1                   | 1.12 (1.00, 1.27)                    | 1.00                           | 1.03 (0.91, 1.18) | 0.27               |
| Model 2                   | 1.17 (1.00, 1.36)                    | 1.00                           | 0.98 (0.85, 1.12) | 0.07               |
| <b>NHS</b>                |                                      |                                |                   |                    |
| Median change             | -0.36                                | 0.00                           | 0.36              |                    |
| Cases/person-years        | 783/150,840                          | 4,479/902,845                  | 731/125,157       |                    |
| Model 1                   | 1.15 (1.06, 1.24)                    | 1.00                           | 1.16 (1.07, 1.25) | 0.98               |

|                            |                   |                 |                   |      |
|----------------------------|-------------------|-----------------|-------------------|------|
| Model 2                    | 1.04 (0.94, 1.14) | 1.00            | 1.02 (0.94, 1.10) | 0.86 |
| <b>NHS II</b>              |                   |                 |                   |      |
| Median change              | -0.36             | 0.00            | 0.36              |      |
| Cases/person-years         | 366/103,632       | 2,896/912,080   | 351/83,876        |      |
| Model 1                    | 1.16 (1.04, 1.29) | 1.00            | 1.32 (1.18, 1.47) | 0.14 |
| Model 2                    | 1.11 (0.97, 1.28) | 1.00            | 1.07 (0.95, 1.20) | 0.90 |
| <b>Pooled<sup>4</sup></b>  |                   |                 |                   |      |
| Model 2                    | 1.08 (1.01, 1.16) | 1.00            | 1.02 (0.97, 1.09) | 0.31 |
| <i>P</i> for heterogeneity | 0.41              | -               | 0.58              | 0.32 |
| <b>Sherbet</b>             | >0.07 serving/d   | ±0.07 serving/d | >0.07 serving/d   |      |
| <b>HPFS</b>                |                   |                 |                   |      |
| Median change              | -0.36             | 0.00            | 0.36              |      |
| Cases/person-years         | 252/51,510        | 1,749/389,222   | 299/64,049        |      |
| Model 1                    | 1.02 (0.89, 1.16) | 1.00            | 1.08 (0.96, 1.23) | 0.44 |
| Model 2                    | 1.01 (0.86, 1.18) | 1.00            | 1.08 (0.95, 1.22) | 0.36 |
| <b>NHS</b>                 |                   |                 |                   |      |
| Median change              | -0.36             | 0.00            | 0.36              |      |
| Cases/person-years         | 938/166,193       | 4,171/827,732   | 884/184,917       |      |
| Model 1                    | 0.99 (0.92, 1.06) | 1.00            | 0.99 (0.92, 1.06) | 0.97 |
| Model 2                    | 0.97 (0.88, 1.07) | 1.00            | 0.99 (0.92, 1.07) | 0.81 |
| <b>NHS II</b>              |                   |                 |                   |      |
| Median change              | -0.36             | 0.00            | 0.36              |      |
| Cases/person-years         | 414/132,142       | 2,868/867,500   | 331/99,947        |      |
| Model 1                    | 1.02 (0.92, 1.13) | 1.00            | 1.03 (0.92, 1.15) | 0.98 |
| Model 2                    | 1.05 (0.93, 1.19) | 1.00            | 0.94 (0.84, 1.05) | 0.16 |
| <b>Pooled<sup>5</sup></b>  |                   |                 |                   |      |
| Model 2                    | 1.00 (0.93, 1.07) | 1.00            | 1.00 (0.94, 1.05) | 0.90 |
| <i>P</i> for heterogeneity | 0.63              | -               | 0.28              | 0.24 |

<sup>1</sup> Cox proportional hazards regression models were adjusted as follows. Model 1: adjusted for age, and stratified by calendar year in 4-year intervals. Model 2: model 1 + race (Caucasian, non-Caucasian), family history of diabetes, updated history of hypercholesterolemia and high blood pressure, initial and change in smoking status (never to never, never to current, past to past, current to past, current to current, missing indicator), menopausal status and postmenopausal hormone use (premenopausal, postmenopausal + current use, postmenopausal + past use, postmenopausal + never use, missing indicator, in NHS and NHS II) and oral contraceptive use (never, current, past, missing indicator, in NHS II), initial BMI (<21.0, 21.0-24.9, 25.0-29.9, 30.0-31.9, >32.0 kg/m<sup>2</sup>), initial and change in physical activity level (MET-h/wk, quintiles), initial and changes in energy and alcohol intakes (quintiles), initial and change in AHEI score (calculated without the alcohol component, quintiles), initial intake of model-specific dairy product (quintiles or tertiles), and initial and change in other dairy product intakes (quintiles). Results of the 3 cohorts were pooled using an inverse variance-weighted, fixed-effect meta-analysis. *P* for heterogeneity was assessed using the Q statistic.

<sup>2</sup> Whole milk *P* value for sex interaction = 0.85.

<sup>3</sup> Cream *P* value for sex interaction = 0.96.

<sup>4</sup> Ice cream *P* value for sex interaction = 0.87.

<sup>5</sup> Sherbet *P* value for sex interaction = 0.81.

Supplementary Table 3: HRs (95% CIs) for type 2 diabetes according to updated 4-year changes in different types of cheese.<sup>1</sup>

|                            | Changes in cheese consumption |                                |                   | <i>P</i> values for trend |
|----------------------------|-------------------------------|--------------------------------|-------------------|---------------------------|
|                            | Decrease                      | No change or relatively stable | Increase          |                           |
| <b>Cottage cheese</b>      | >0.07 serving/d               | ±0.07 serving/d                | >0.07 serving/d   |                           |
| <b>HPFS</b>                |                               |                                |                   |                           |
| Median change              | -0.36                         | 0.00                           | 0.36              |                           |
| Cases/person-years         | 221/44,344                    | 1,863/418,663                  | 216/41,774        |                           |
| Model 1                    | 1.12 (0.98, 1.29)             | 1.00                           | 1.10 (0.95, 1.27) | 0.81                      |
| Model 2                    | 1.05 (0.89, 1.25)             | 1.00                           | 1.01 (0.88, 1.17) | 0.79                      |
| <b>NHS</b>                 |                               |                                |                   |                           |
| Median change              | -0.36                         | 0.00                           | 0.36              |                           |
| Cases/person-years         | 749/142,235                   | 4,598/918,498                  | 646/118,109       |                           |
| Model 1                    | 1.05 (0.97, 1.13)             | 1.00                           | 1.08 (1.00, 1.18) | 0.65                      |
| Model 2                    | 1.02 (0.93, 1.13)             | 1.00                           | 1.05 (0.96, 1.14) | 0.58                      |
| <b>NHS II</b>              |                               |                                |                   |                           |
| Median change              | -0.36                         | 0.00                           | 0.36              |                           |
| Cases/person-years         | 277/80,038                    | 2,953/932,410                  | 383/87,141        |                           |
| Model 1                    | 1.04 (0.92, 1.18)             | 1.00                           | 1.23 (1.10, 1.36) | 0.02                      |
| Model 2                    | 1.12 (0.97, 1.30)             | 1.00                           | 1.20 (1.08, 1.34) | 0.09                      |
| <b>Pooled<sup>2</sup></b>  |                               |                                |                   |                           |
| Model 2                    | 1.05 (0.98, 1.13)             | 1.00                           | 1.09 (1.02, 1.15) | 0.24                      |
| <i>P</i> for heterogeneity | 0.58                          | -                              | 0.08              | 0.39                      |
| <b>Cream cheese</b>        | >0.07 serving/d               | ±0.07 serving/d                | >0.07 serving/d   |                           |
| <b>HPFS</b>                |                               |                                |                   |                           |
| Median change              | -0.29                         | 0.00                           | 0.36              |                           |
| Cases/person-years         | 129/23,387                    | 2,016/455,418                  | 155/25,976        |                           |
| Model 1                    | 1.24 (1.04, 1.48)             | 1.00                           | 1.32 (1.12, 1.56) | 0.23                      |
| Model 2                    | 1.09 (0.90, 1.32)             | 1.00                           | 1.17 (0.99, 1.38) | 0.34                      |
| <b>NHS</b>                 |                               |                                |                   |                           |
| Median change              | -0.36                         | 0.00                           | 0.36              |                           |
| Cases/person-years         | 896/166,114                   | 3,861/827,510                  | 1,236/185,218     |                           |
| Model 1                    | 1.00 (0.91, 1.09)             | 1.00                           | 1.11 (1.03, 1.20) | 0.03                      |
| Model 2                    | 0.92 (0.83, 1.01)             | 1.00                           | 1.09 (1.00, 1.18) | 0.005                     |
| <b>NHS II</b>              |                               |                                |                   |                           |
| Median change              | -0.36                         | 0.00                           | 0.36              |                           |
| Cases/person-years         | 238/70,667                    | 3,126/962,147                  | 249/66,775        |                           |
| Model 1                    | 1.04 (0.91, 1.19)             | 1.00                           | 1.30 (1.14, 1.48) | 0.02                      |
| Model 2                    | 0.99 (0.86, 1.15)             | 1.00                           | 1.13 (0.99, 1.29) | 0.15                      |

|                            |                   |                         |                 |                         |                                |       |
|----------------------------|-------------------|-------------------------|-----------------|-------------------------|--------------------------------|-------|
| <b>Pooled<sup>3</sup></b>  |                   |                         |                 |                         |                                |       |
| Model 2                    | 0.96 (0.89, 1.04) |                         | 1.00            |                         | 1.11 (1.04, 1.18)              | 0.001 |
| <i>P</i> for heterogeneity | 0.25              |                         | -               |                         | 0.71                           | 0.94  |
| <b>Other cheeses</b>       | >0.07 serving/d   |                         | ±0.07 serving/d |                         | >0.07 serving/d                |       |
| <b>HPFS</b>                |                   |                         |                 |                         |                                |       |
| Median change              | -0.36             |                         | 0.00            |                         | 0.36                           |       |
| Cases/person-years         | 536/120,655       |                         | 1,132/264,696   |                         | 632/119,430                    |       |
| Model 1                    | 1.09 (0.98, 1.21) |                         | 1.00            |                         | 1.22 (1.11, 1.35)              | 0.04  |
| Model 2                    | 1.03 (0.92, 1.16) |                         | 1.00            |                         | 1.15 (1.04, 1.27)              | 0.06  |
| <b>NHS</b>                 |                   |                         |                 |                         |                                |       |
| Median change              | -0.36             |                         | 0.00            |                         | 0.36                           |       |
| Cases/person-years         | 1,896/357,130     |                         | 2,531/518,817   |                         | 1,566/302,895                  |       |
| Model 1                    | 1.02 (0.95, 1.08) |                         | 1.00            |                         | 1.02 (0.95, 1.09)              | 0.97  |
| Model 2                    | 0.99 (0.91, 1.08) |                         | 1.00            |                         | 0.98 (0.91, 1.05)              | 0.79  |
| <b>NHS II</b>              |                   |                         |                 |                         |                                |       |
| Median change              | -0.36             |                         | 0.00            |                         | 0.36                           |       |
| Cases/person-years         | 855/285,625       |                         | 1,681/515,874   |                         | 1,077/298,089                  |       |
| Model 1                    | 0.96 (0.88, 1.04) |                         | 1.00            |                         | 1.08 (1.00, 1.16)              | 0.01  |
| Model 2                    | 0.94 (0.85, 1.03) |                         | 1.00            |                         | 1.02 (0.94, 1.10)              | 0.13  |
| <b>Pooled<sup>4</sup></b>  |                   |                         |                 |                         |                                |       |
| Model 2                    | 0.98 (0.93, 1.04) |                         | 1.00            |                         | 1.03 (0.98, 1.08) <sup>‡</sup> | 0.10  |
| <i>P</i> for heterogeneity | 0.38              |                         | -               |                         | 0.04                           | 0.20  |
| <b>Low-fat cheese</b>      | >0.50 serving/d   | >0.07 to 0.50 serving/d | ±0.07 serving/d | >0.07 to 0.50 serving/d | >0.50 serving/d                |       |
| <b>HPFS</b>                |                   |                         |                 |                         |                                |       |
| Median change              | -0.79             | -0.29                   | 0.00            | 0.29                    | 0.79                           |       |
| Cases/person-years         | 75/11,278         | 275/56,665              | 1,511/354,004   | 336/66,890              | 103/15,945                     |       |
| Model 1                    | 1.45 (1.15, 1.83) | 1.08 (0.95, 1.23)       | 1.00            | 1.09 (0.96, 1.22)       | 1.37 (1.12, 1.67)              | 0.71  |
| Model 2                    | 1.40 (1.07, 1.83) | 1.04 (0.89, 1.23)       | 1.00            | 1.08 (0.96, 1.22)       | 1.29 (1.05, 1.59)              | 0.43  |
| <b>NHS</b>                 |                   |                         |                 |                         |                                |       |
| Median change              | -0.79             | -0.29                   | 0.00            | 0.36                    | 0.79                           |       |
| Cases/person-years         | 225/40,950        | 917/167,280             | 3,695/745,769   | 861/173,927             | 295/50,915                     |       |
| Model 1                    | 0.99 (0.86, 1.14) | 1.01 (0.94, 1.09)       | 1.00            | 0.97 (0.90, 1.05)       | 1.10 (0.97, 1.24)              | 0.66  |
| Model 2                    | 0.96 (0.79, 1.16) | 0.97 (0.85, 1.10)       | 1.00            | 0.95 (0.84, 1.08)       | 1.07 (0.90, 1.27)              | 0.41  |
| <b>NHS II</b>              |                   |                         |                 |                         |                                |       |
| Median change              | -0.79             | -0.29                   | 0.00            | 0.36                    | 0.86                           |       |
| Cases/person-years         | 145/34,471        | 449/123,878             | 2,183/704,324   | 615/176,576             | 221/60,340                     |       |
| Model 1                    | 1.16 (0.98, 1.37) | 1.06 (0.95, 1.17)       | 1.00            | 1.13 (1.04, 1.24)       | 1.11 (0.97, 1.28)              | 0.35  |
| Model 2                    | 1.05 (0.86, 1.29) | 1.02 (0.89, 1.16)       | 1.00            | 1.14 (1.04, 1.26)       | 1.08 (0.93, 1.25)              | 0.10  |
| <b>Pooled<sup>5</sup></b>  |                   |                         |                 |                         |                                |       |
| Model 2                    | 1.08 (0.95, 1.22) | 1.00 (0.93, 1.09)       | 1.00            | 1.07 (1.01, 1.14)       | 1.12 (1.02, 1.23)              | 0.05  |



| <i>P</i> for heterogeneity | 0.08              | 0.76                    | -               | 0.07                    | 0.31              | 0.96   |
|----------------------------|-------------------|-------------------------|-----------------|-------------------------|-------------------|--------|
| <b>High-fat cheese</b>     | >0.50 serving/d   | >0.07 to 0.50 serving/d | ±0.07 serving/d | >0.07 to 0.50 serving/d | >0.50 serving/d   |        |
| <b>HPFS</b>                |                   |                         |                 |                         |                   |        |
| Median change              | -0.79             | -0.29                   | 0.00            | 0.29                    | 0.79              |        |
| Cases/person-years         | 164/32,272        | 489/111,007             | 1,024/236,559   | 461/96,187              | 162/28,756        |        |
| Model 1                    | 1.25 (1.06, 1.47) | 1.07 (0.96, 1.19)       | 1.00            | 1.11 (0.99, 1.24)       | 1.31 (1.11, 1.55) | 0.53   |
| Model 2                    | 1.09 (0.89, 1.34) | 1.02 (0.90, 1.16)       | 1.00            | 1.04 (0.93, 1.17)       | 1.11 (0.93, 1.31) | 0.62   |
| <b>NHS</b>                 |                   |                         |                 |                         |                   |        |
| Median change              | -0.79             | -0.36                   | 0.00            | 0.29                    | 0.79              |        |
| Cases/person-years         | 379/87,874        | 1,330/281,990           | 2,602/510,136   | 1,275/228,341           | 407/70,500        |        |
| Model 1                    | 0.93 (0.83, 1.04) | 0.98 (0.92, 1.05)       | 1.00            | 1.05 (0.98, 1.12)       | 1.08 (0.97, 1.19) | 0.01   |
| Model 2                    | 0.85 (0.74, 0.96) | 0.92 (0.85, 0.99)       | 1.00            | 1.01 (0.94, 1.08)       | 1.00 (0.90, 1.11) | 0.02   |
| <b>NHS II</b>              |                   |                         |                 |                         |                   |        |
| Median change              | -0.79             | -0.29                   | 0.00            | 0.29                    | 0.79              |        |
| Cases/person-years         | 313/101,960       | 765/266,103             | 1,424/431,919   | 742/213,277             | 369/86,330        |        |
| Model 1                    | 1.06 (0.93, 1.19) | 0.99 (0.90, 1.08)       | 1.00            | 1.09 (0.99, 1.19)       | 1.32 (1.18, 1.48) | 0.0005 |
| Model 2                    | 0.92 (0.79, 1.08) | 0.93 (0.84, 1.03)       | 1.00            | 1.06 (0.97, 1.16)       | 1.17 (1.04, 1.32) | 0.0006 |
| <b>Pooled<sup>6</sup></b>  |                   |                         |                 |                         |                   |        |
| Model 2                    | 0.92 (0.84, 1.00) | 0.94 (0.89, 0.99)       | 1.00            | 1.03 (0.98, 1.08)       | 1.08 (1.00, 1.16) | 0.0001 |
| <i>P</i> for heterogeneity | 0.11              | 0.35                    | -               | 0.71                    | 0.13              | 0.24   |

<sup>1</sup> Cox proportional hazards regression models were adjusted as follows. Model 1: adjusted for age, and stratified by calendar year in 4-year intervals. Model 2: model 1 + race (Caucasian, non-Caucasian), family history of diabetes, updated history of hypercholesterolemia and high blood pressure, initial and change in smoking status (never to never, never to current, past to past, current to past, current to current, missing indicator), menopausal status and postmenopausal hormone use (premenopausal, postmenopausal + current use, postmenopausal + past use, postmenopausal + never use, missing indicator, in NHS and NHS II) and oral contraceptive use (never, current, past, missing indicator, in NHS II), initial BMI (<21.0, 21.0-24.9, 25.0-29.9, 30.0-31.9, >32.0 kg/m<sup>2</sup>), initial and change in physical activity level (MET-h/wk, quintiles), initial and changes in energy and alcohol intakes (quintiles), initial and change in AHEI score (calculated without the alcohol component, quintiles), initial intake of model-specific dairy product (quintiles or tertiles), and initial and change in other cheeses and dairy product intakes (quintiles). Results of the 3 cohorts were pooled using an inverse variance-weighted, fixed-effect meta-analysis. *P* for heterogeneity was assessed using the Q statistic. Low-fat cheese includes cottage cheese and other low-fat/reduced-fat/non-fat cheeses. High-fat cheese includes cream cheese and other high-fat cheeses.

<sup>2</sup> Cottage cheese *P* value for sex interaction = 0.89.

<sup>3</sup> Cream cheese *P* value for sex interaction = 0.60.

<sup>4</sup> Other cheeses *P* value for sex interaction = 0.26.

<sup>5</sup> Low-fat cheese *P* value for sex interaction = 0.04.

<sup>6</sup> High-fat cheese *P* value for sex interaction = 0.55.

Supplementary Table 4: HRs (95% CIs) for type 2 diabetes according to updated 4-year changes in dairy product consumption with further adjustment for concurrent 4-year change in body weight.<sup>1</sup>

|                                | Changes in dairy product consumption |                                |                 |                         |                   | P values for trend |
|--------------------------------|--------------------------------------|--------------------------------|-----------------|-------------------------|-------------------|--------------------|
|                                | Decrease                             | No change or relatively stable |                 | Increase                |                   |                    |
| <b>Total dairy</b>             | >1.00 serving/d                      | >0.14 to 1.00 serving/d        | ±0.14 serving/d | >0.14 to 1.00 serving/d | >1.00 serving/d   |                    |
| HPFS                           | 1.14 (0.96, 1.35)                    | 1.09 (0.95, 1.25)              | 1.00            | 1.11 (0.97, 1.26)       | 1.13 (0.97, 1.31) | 0.86               |
| NHS                            | 1.07 (0.97, 1.19)                    | 1.00 (0.92, 1.09)              | 1.00            | 1.03 (0.95, 1.13)       | 0.98 (0.89, 1.08) | 0.16               |
| NHS II                         | 1.13 (0.99, 1.30)                    | 0.93 (0.83, 1.05)              | 1.00            | 1.02 (0.91, 1.15)       | 0.93 (0.82, 1.06) | 0.02               |
| Pooled                         | 1.10 (1.02, 1.19)                    | 1.00 (0.94, 1.07)              | 1.00            | 1.05 (0.98, 1.11)       | 0.99 (0.93, 1.06) | 0.02               |
| P for heterogeneity            | 0.75                                 | 0.24                           | -               | 0.61                    | 0.15              | 0.34               |
| <b>Low-fat dairy</b>           | >0.50 serving/d                      | >0.07 to 0.50 serving/d        | ±0.07 serving/d | >0.07 to 0.50 serving/d | >0.50 serving/d   |                    |
| HPFS                           | 1.06 (0.91, 1.24)                    | 1.13 (0.98, 1.29)              | 1.00            | 1.05 (0.92, 1.20)       | 1.13 (0.99, 1.29) | 0.48               |
| NHS                            | 1.05 (0.95, 1.15)                    | 0.99 (0.90, 1.08)              | 1.00            | 0.99 (0.90, 1.09)       | 0.96 (0.88, 1.05) | 0.05               |
| NHS II                         | 1.11 (0.97, 1.27)                    | 1.00 (0.88, 1.13)              | 1.00            | 1.06 (0.94, 1.20)       | 0.99 (0.88, 1.12) | 0.09               |
| Pooled                         | 1.07 (1.00, 1.15)                    | 1.02 (0.95, 1.09)              | 1.00            | 1.02 (0.96, 1.09)       | 1.00 (0.94, 1.07) | 0.04               |
| P for heterogeneity            | 0.78                                 | 0.27                           | -               | 0.62                    | 0.14              | 0.25               |
| <b>High-fat dairy</b>          | >0.50 serving/d                      | >0.07 to 0.50 serving/d        | ±0.07 serving/d | >0.07 to 0.50 serving/d | >0.50 serving/d   |                    |
| HPFS                           | 1.08 (0.91, 1.27)                    | 0.92 (0.80, 1.04)              | 1.00            | 0.91 (0.80, 1.03)       | 0.99 (0.86, 1.14) | 0.42               |
| NHS                            | 0.90 (0.80, 0.99)                    | 0.92 (0.85, 1.00)              | 1.00            | 1.03 (0.95, 1.11)       | 0.98 (0.90, 1.07) | 0.03               |
| NHS II                         | 1.16 (1.01, 1.32)                    | 1.03 (0.92, 1.14)              | 1.00            | 1.04 (0.94, 1.15)       | 1.09 (0.98, 1.22) | 0.96               |
| Pooled                         | 1.00 (0.93, 1.08)                    | 0.95 (0.89, 1.00)              | 1.00            | 1.01 (0.95, 1.06)       | 1.02 (0.96, 1.08) | 0.26               |
| P for heterogeneity            | 0.006                                | 0.24                           | -               | 0.19                    | 0.29              | 0.13               |
| <b>Reduced-fat milk (0-2%)</b> | >0.50 serving/d                      | >0.07 to 0.50 serving/d        | ±0.07 serving/d | >0.07 to 0.50 serving/d | >0.50 serving/d   |                    |
| HPFS                           | 0.97 (0.84, 1.12)                    | 1.23 (1.08, 1.40)              | 1.00            | 1.16 (1.02, 1.31)       | 1.11 (0.97, 1.25) | 0.29               |
| NHS                            | 1.09 (1.01, 1.18)                    | 0.94 (0.86, 1.03)              | 1.00            | 0.98 (0.90, 1.06)       | 0.92 (0.85, 0.99) | 0.003              |
| NHS II                         | 1.07 (0.95, 1.20)                    | 1.00 (0.90, 1.12)              | 1.00            | 0.99 (0.89, 1.10)       | 0.99 (0.89, 1.10) | 0.31               |
| Pooled                         | 1.06 (1.00, 1.13)                    | 1.01 (0.95, 1.08)              | 1.00            | 1.02 (0.96, 1.08)       | 0.97 (0.92, 1.03) | 0.03               |
| P for heterogeneity            | 0.37                                 | 0.004                          | -               | 0.08                    | 0.05              | 0.05               |
| <b>Whole milk</b>              | >0.07 serving/d                      |                                | ±0.07 serving/d |                         | >0.07 serving/d   |                    |
| HPFS                           | 1.09 (0.83, 1.45)                    |                                | 1.00            |                         | 1.04 (0.83, 1.31) | 0.86               |
| NHS                            | 1.06 (0.89, 1.26)                    |                                | 1.00            |                         | 1.01 (0.87, 1.17) | 0.67               |
| NHS II                         | 1.10 (0.84, 1.44)                    |                                | 1.00            |                         | 0.95 (0.76, 1.18) | 0.38               |
| Pooled                         | 1.08 (0.95, 1.22)                    |                                | 1.00            |                         | 1.00 (0.90, 1.12) | 0.41               |
| P for heterogeneity            | 0.97                                 |                                | -               |                         | 0.84              | 0.86               |
| <b>Yogurt</b>                  | >0.50 serving/d                      | >0.07 to 0.50 serving/d        | ±0.07 serving/d | >0.07 to 0.50 serving/d | >0.50 serving/d   |                    |
| HPFS                           | 0.99 (0.71, 1.39)                    | 1.05 (0.88, 1.25)              | 1.00            | 0.87 (0.75, 1.01)       | 1.11 (0.86, 1.44) | 0.59               |
| NHS                            | 1.03 (0.90, 1.18)                    | 1.03 (0.94, 1.14)              | 1.00            | 0.96 (0.89, 1.03)       | 0.87 (0.78, 0.96) | 0.004              |
| NHS II                         | 1.17 (0.97, 1.40)                    | 1.04 (0.92, 1.17)              | 1.00            | 0.96 (0.88, 1.05)       | 0.93 (0.80, 1.07) | 0.03               |
| Pooled                         | 1.07 (0.96, 1.19)                    | 1.04 (0.97, 1.11)              | 1.00            | 0.95 (0.90, 1.00)       | 0.90 (0.84, 0.98) | 0.0003             |
| P for heterogeneity            | 0.51                                 | 0.99                           | -               | 0.46                    | 0.20              | 0.84               |

| <b>Total cheese</b>        | >0.50 serving/d   | >0.07 to 0.50 serving/d | ±0.07 serving/d | >0.07 to 0.50 serving/d | >0.50 serving/d   |        |
|----------------------------|-------------------|-------------------------|-----------------|-------------------------|-------------------|--------|
| HPFS                       | 1.13 (0.94, 1.36) | 0.98 (0.87, 1.11)       | 1.00            | 1.04 (0.93, 1.16)       | 1.14 (0.98, 1.32) | 0.41   |
| NHS                        | 0.89 (0.79, 1.00) | 0.96 (0.89, 1.03)       | 1.00            | 0.96 (0.89, 1.03)       | 1.02 (0.93, 1.12) | 0.15   |
| NHS II                     | 1.00 (0.87, 1.16) | 0.96 (0.87, 1.06)       | 1.00            | 1.02 (0.93, 1.11)       | 1.19 (1.06, 1.32) | 0.004  |
| Pooled                     | 0.97 (0.89, 1.05) | 0.96 (0.91, 1.02)       | 1.00            | 0.99 (0.95, 1.04)       | 1.10 (1.03, 1.17) | 0.002  |
| <i>P</i> for heterogeneity | 0.09              | 0.95                    | -               | 0.38                    | 0.12              | 0.38   |
| <b>Cottage cheese</b>      | >0.07 serving/d   |                         | ±0.07 serving/d |                         | >0.07 serving/d   |        |
| HPFS                       | 1.05 (0.88, 1.25) |                         | 1.00            |                         | 1.02 (0.88, 1.18) | 0.84   |
| NHS                        | 1.02 (0.92, 1.12) |                         | 1.00            |                         | 1.06 (0.97, 1.15) | 0.44   |
| NHS II                     | 1.10 (0.95, 1.27) |                         | 1.00            |                         | 1.24 (1.11, 1.38) | 0.02   |
| Pooled                     | 1.04 (0.97, 1.12) |                         | 1.00            |                         | 1.10 (1.04, 1.17) | 0.10   |
| <i>P</i> for heterogeneity | 0.66              |                         | -               |                         | 0.04              | 0.23   |
| <b>Cream cheese</b>        | >0.07 serving/d   |                         | ±0.07 serving/d |                         | >0.07 serving/d   |        |
| HPFS                       | 1.09 (0.90, 1.32) |                         | 1.00            |                         | 1.17 (0.99, 1.38) | 0.36   |
| NHS                        | 0.92 (0.83, 1.01) |                         | 1.00            |                         | 1.08 (1.00, 1.17) | 0.007  |
| NHS II                     | 1.00 (0.87, 1.16) |                         | 1.00            |                         | 1.14 (1.00, 1.30) | 0.16   |
| Pooled                     | 0.97 (0.90, 1.04) |                         | 1.00            |                         | 1.11 (1.04, 1.18) | 0.002  |
| <i>P</i> for heterogeneity | 0.24              |                         | -               |                         | 0.64              | 0.96   |
| <b>Other cheeses</b>       | >0.07 serving/d   |                         | ±0.07 serving/d |                         | >0.07 serving/d   |        |
| HPFS                       | 1.04 (0.92, 1.17) |                         | 1.00            |                         | 1.14 (1.03, 1.26) | 0.08   |
| NHS                        | 1.00 (0.92, 1.09) |                         | 1.00            |                         | 0.97 (0.90, 1.04) | 0.53   |
| NHS II                     | 0.95 (0.86, 1.04) |                         | 1.00            |                         | 1.02 (0.94, 1.10) | 0.19   |
| Pooled                     | 0.99 (0.94, 1.04) |                         | 1.00            |                         | 1.02 (0.98, 1.07) | 0.22   |
| <i>P</i> for heterogeneity | 0.46              |                         | -               |                         | 0.03              | 0.16   |
| <b>Low-fat cheese</b>      | >0.50 serving/d   | >0.07 to 0.50 serving/d | ±0.07 serving/d | >0.07 to 0.50 serving/d | >0.50 serving/d   |        |
| HPFS                       | 1.40 (1.07, 1.83) | 1.04 (0.89, 1.23)       | 1.00            | 1.09 (0.96, 1.23)       | 1.29 (1.05, 1.59) | 0.40   |
| NHS                        | 0.95 (0.78, 1.15) | 0.97 (0.85, 1.10)       | 1.00            | 0.95 (0.84, 1.08)       | 1.08 (0.91, 1.28) | 0.34   |
| NHS II                     | 1.04 (0.85, 1.28) | 1.02 (0.89, 1.16)       | 1.00            | 1.16 (1.06, 1.28)       | 1.12 (0.97, 1.29) | 0.03   |
| Pooled                     | 1.07 (0.94, 1.21) | 1.00 (0.93, 1.09)       | 1.00            | 1.08 (1.01, 1.15)       | 1.14 (1.04, 1.26) | 0.01   |
| <i>P</i> for heterogeneity | 0.07              | 0.74                    | -               | 0.04                    | 0.39              | 0.84   |
| <b>High-fat cheese</b>     | >0.50 serving/d   | >0.07 to 0.50 serving/d | ±0.07 serving/d | >0.07 to 0.50 serving/d | >0.50 serving/d   |        |
| HPFS                       | 1.10 (0.89, 1.34) | 1.02 (0.90, 1.16)       | 1.00            | 1.04 (0.93, 1.16)       | 1.11 (0.93, 1.31) | 0.67   |
| NHS                        | 0.85 (0.75, 0.97) | 0.92 (0.85, 1.00)       | 1.00            | 1.01 (0.94, 1.08)       | 0.99 (0.88, 1.10) | 0.04   |
| NHS II                     | 0.94 (0.80, 1.10) | 0.95 (0.86, 1.05)       | 1.00            | 1.05 (0.96, 1.15)       | 1.18 (1.05, 1.33) | 0.001  |
| Pooled                     | 0.92 (0.84, 1.01) | 0.95 (0.90, 1.00)       | 1.00            | 1.02 (0.98, 1.08)       | 1.08 (1.00, 1.16) | 0.0005 |
| <i>P</i> for heterogeneity | 0.12              | 0.37                    | -               | 0.75                    | 0.08              | 0.25   |
| <b>Cream</b>               | >0.07 serving/d   |                         | ±0.07 serving/d |                         | >0.07 serving/d   |        |
| HPFS                       | 1.04 (0.87, 1.24) |                         | 1.00            |                         | 1.03 (0.90, 1.19) | 0.93   |
| NHS                        | 0.99 (0.89, 1.09) |                         | 1.00            |                         | 1.08 (1.00, 1.17) | 0.09   |
| NHS II                     | 1.09 (0.95, 1.24) |                         | 1.00            |                         | 1.02 (0.93, 1.12) | 0.71   |
| Pooled                     | 1.03 (0.95, 1.10) |                         | 1.00            |                         | 1.05 (0.99, 1.11) | 0.40   |
| <i>P</i> for heterogeneity | 0.51              |                         | -               |                         | 0.67              | 0.31   |
| <b>Ice cream</b>           | >0.07 serving/d   |                         | ±0.07 serving/d |                         | >0.07 serving/d   |        |
| HPFS                       | 1.17 (1.00, 1.36) |                         | 1.00            |                         | 0.97 (0.85, 1.11) | 0.06   |

|                            |                   |                 |                   |      |
|----------------------------|-------------------|-----------------|-------------------|------|
| NHS                        | 1.05 (0.96, 1.16) | 1.00            | 1.00 (0.92, 1.09) | 0.46 |
| NHS II                     | 1.15 (1.00, 1.32) | 1.00            | 1.04 (0.93, 1.17) | 0.41 |
| Pooled                     | 1.10 (1.03, 1.18) | 1.00            | 1.01 (0.95, 1.07) | 0.07 |
| <i>P</i> for heterogeneity | 0.43              | -               | 0.73              | 0.49 |
| <b>Sherbet</b>             | >0.07 serving/d   | ±0.07 serving/d | >0.07 serving/d   |      |
| HPFS                       | 1.00 (0.85, 1.17) | 1.00            | 1.08 (0.95, 1.22) | 0.31 |
| NHS                        | 0.97 (0.88, 1.06) | 1.00            | 1.00 (0.93, 1.08) | 0.61 |
| NHS II                     | 1.04 (0.92, 1.18) | 1.00            | 0.96 (0.85, 1.07) | 0.29 |
| Pooled                     | 0.99 (0.93, 1.06) | 1.00            | 1.00 (0.95, 1.06) | 0.78 |
| <i>P</i> for heterogeneity | 0.65              | -               | 0.37              | 0.31 |

<sup>1</sup> Cox proportional hazards regression models were stratified by calendar year in 4-year intervals and adjusted for age, race (Caucasian, non-Caucasian), family history of diabetes, updated history of hypercholesterolemia and high blood pressure, initial and change in smoking status (never to never, never to current, past to past, current to past, current to current, missing indicator), menopausal status and postmenopausal hormone use (premenopausal, postmenopausal + current use, postmenopausal + past use, postmenopausal + never use, missing indicator, in NHS and NHS II) and oral contraceptive use (never, current, past, missing indicator, in NHS II), initial BMI (<21.0, 21.0-24.9, 25.0-29.9, 30.0-31.9, >32.0 kg/m<sup>2</sup>), initial and change in physical activity level (MET-h/wk, quintiles), initial and changes in energy and alcohol intakes (quintiles), initial and change in AHEI score (calculated without the alcohol component, quintiles), and initial intake of model-specific dairy product (quintiles or tertiles), and initial and change in other dairy product intakes (quintiles), and change in body weight (quintiles). † Results of the 3 cohorts were pooled using an inverse variance-weighted, fixed-effect meta-analysis. *P* for heterogeneity was assessed using the Q statistic.

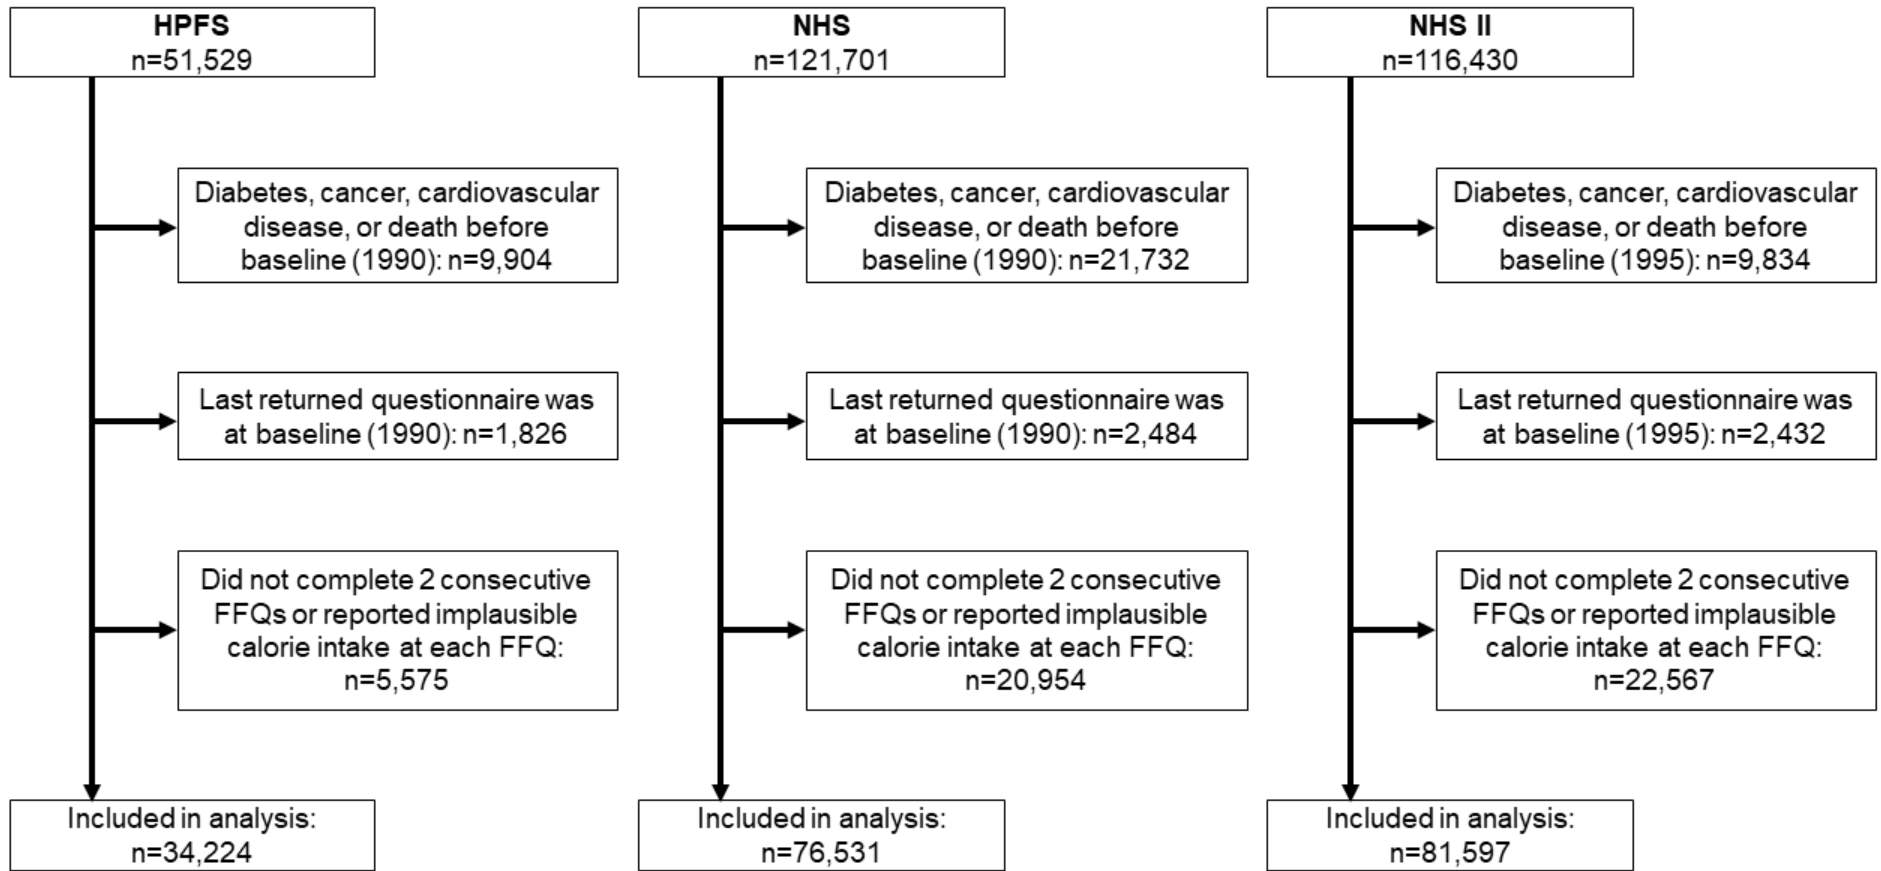

**Supplementary Figure 1: Flow chart of participants.** FFQ: Food frequency questionnaire; HPFS: Health Professionals' Follow-up Study; NHS: Nurses' Health Study; NHS II: Nurses' Health Study II.
